# Supplementary material for: TLR3 Serves as a Prognostic Biomarker and Associates with Immune Infiltration in the Renal Clear Cell Carcinoma Microenvironment
Source: Hindawi journal article supplement (doi:10.1155/2021/3336770), 2021-09-06
Supplement: f1 [file 3336770.f1.zip]

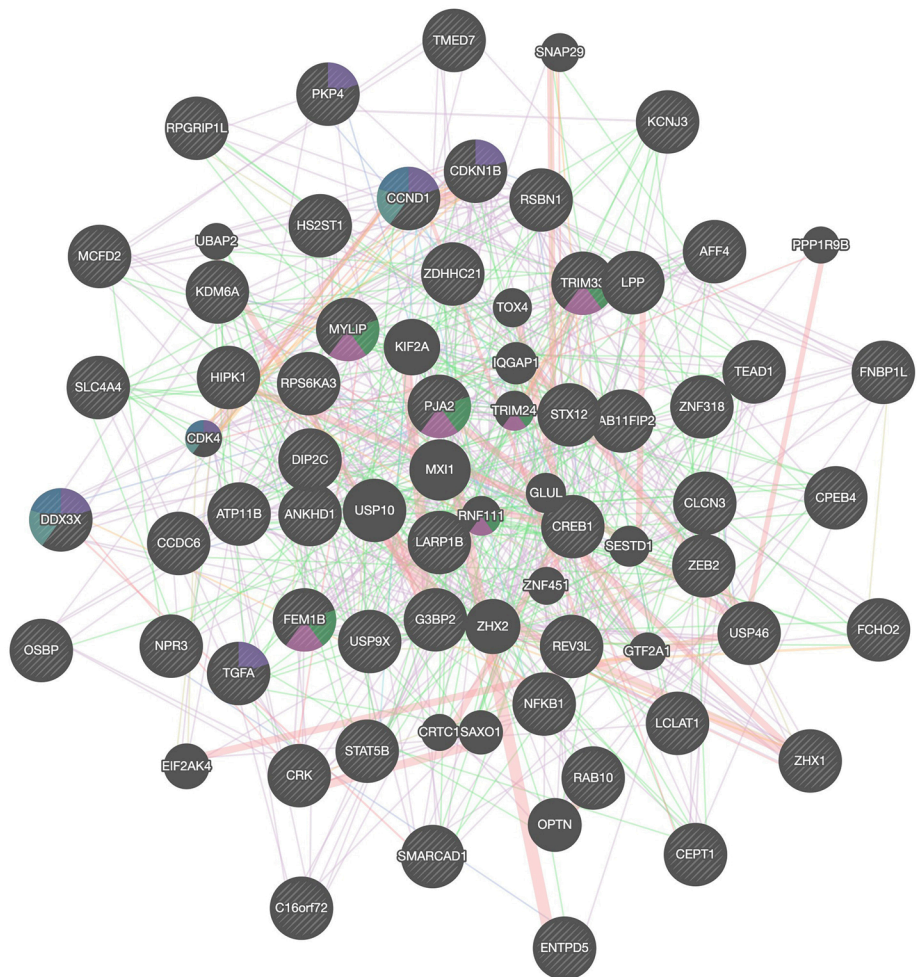

- Co-expression
- Physical Interactions
- Predicted
- Co-localization
- Pathway
- Genetic Interactions
- Shared protein domains
- positive regulation of cell cycle process
- ubiquitin-protein ligase activity
- small conjugating protein ligase activity
- positive regulation of mitotic cell cycle phase transition
- positive regulation of cell cycle phase transition
