# Supplementary figures and images for: TLR3 Serves as a Prognostic Biomarker and Associates with Immune Infiltration in the Renal Clear Cell Carcinoma Microenvironment
Source: Hindawi journal article supplement (doi:10.1155/2021/3336770), 2021-09-06

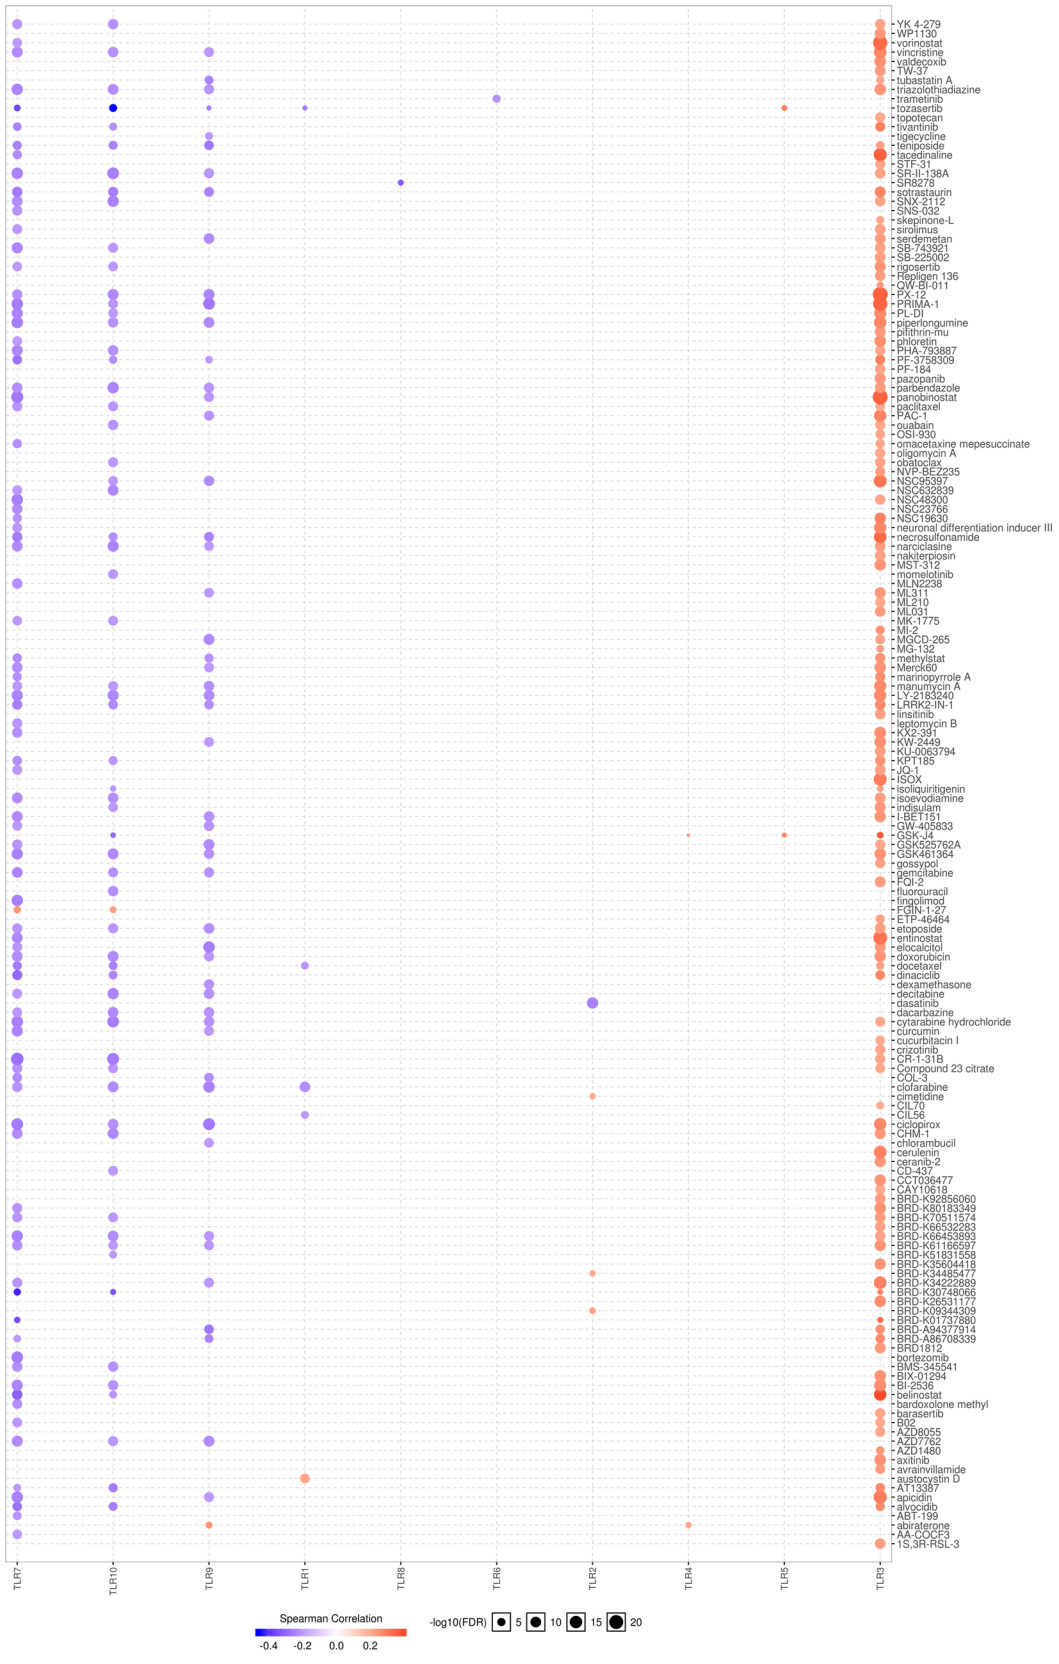

Supplement: f1 [file 3336770.f1.zip]
